# Supplementary material for: Molecular Characterization of TGF-Beta Gene Family in Buffalo to Identify Gene Duplication and Functional Mutations
Source: MDPI journal article supplement (doi:10.3390/genes13081302), 2022-07-22
Supplement: s1 [file s1]

## Supplementary material

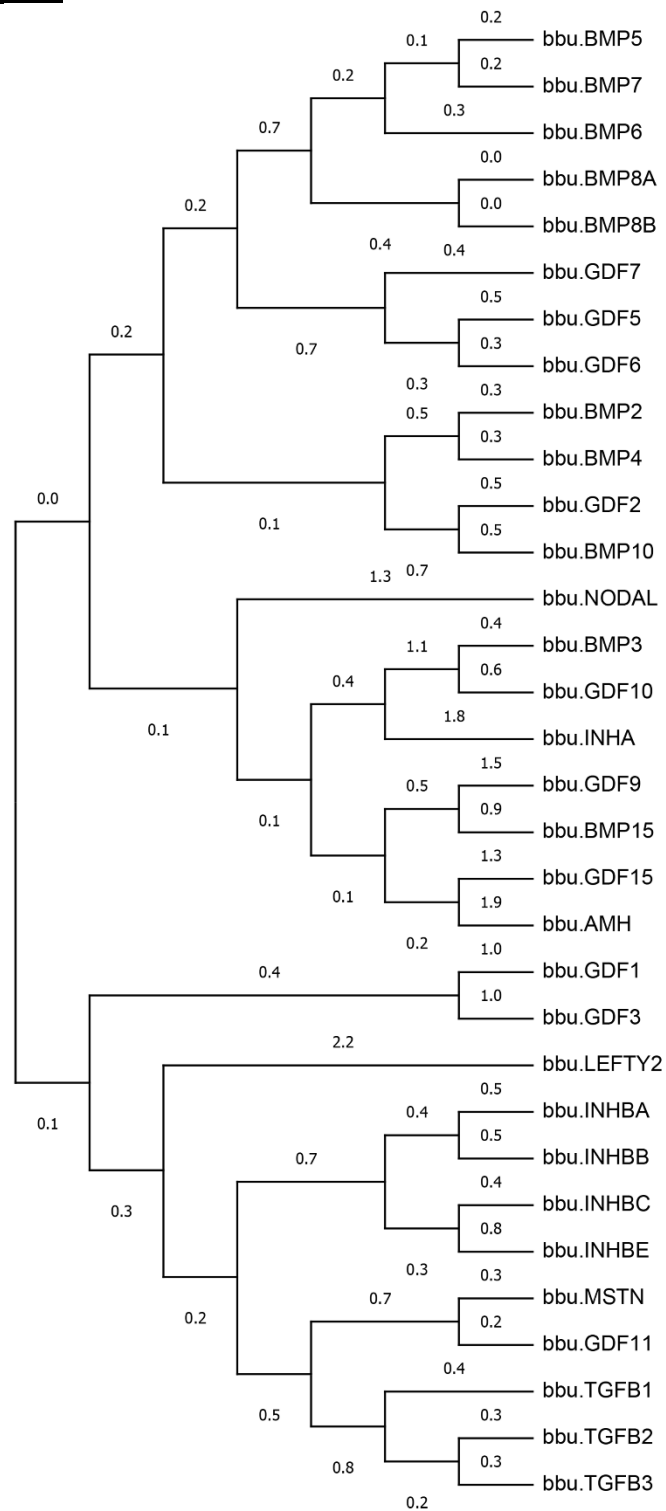

Figure S1. Molecular phylogenetic analysis of all the buffalo *TGF-β* genes for putative duplication detection

|           |                                                                                                      |     |
|-----------|------------------------------------------------------------------------------------------------------|-----|
| bta.TGFB2 | MHYCVLSAFLLLHLVVALSSTCSTLMDQFMRKRIFAIRGOILSKLKLTPSPEDYPEPEEVPPEVISIYNSTRDLLQEKASRRAAACERERSDEEYVA    | 100 |
| bbu.TGFB2 | MHYCVLSAFLLLHLVVALSSTCSTLMDQFMRKRIFAIRGOILSKLKLTPSPEDYPEPEEVPPEVISIYNSTRDLLQEKASRRAAACERERSDEEYVA    | 100 |
| bta.TGFB2 | KEVYKIDMPSFLPSETVCPVVVTPSGSVGSLCSRQSOVFCGYLDAIPPTFYRPYFRIVRFDVSSMEKNASNLVKAEFRVFRLLQNKARVPEQRIELYQIL | 200 |
| bbu.TGFB2 | KEVYKIDMPSFLPSETVCPVVVTPSGSVGSLCSRQSOVFCGYLDAIPPTFYRPYFRIVRFDVSSMEKNASNLVKAEFRVFRLLQNKARVPEQRIELYQIL | 200 |
| bta.TGFB2 | KSKDLTSPTQRYIDSKVVKTRAEGEWLSFDVTDVHVEHLHKKDRNLGFKISLHCPCTFVPSNNYIIPNKSEELARFAGIDGTSTYTSQDQKTIKSTRK   | 300 |
| bbu.TGFB2 | KSKDLTSPTQRYIDSKVVKTRAEGEWLSFDVTDVHVEHLHKKDRNLGFKISLHCPCTFVPSNNYIIPNKSEELARFAGIDGTSTYTSQDQKTIKSTRK   | 300 |
| bta.TGFB2 | KNSGKSPHLLMLLPYSYRLESQOSNRKKRALDAAYCFNRVQDNCLRLPYIDFKRDLGWKWIHEPKGYNANFCAGACPYLWSSDQHSRVLSLYNTINF    | 400 |
| bbu.TGFB2 | KNSGKSPHLLMLLPYSYRLESQOSNRKKRALDAAYCFNRVQDNCLRLPYIDFKRDLGWKWIHEPKGYNANFCAGACPYLWSSDQHSRVLSLYNTINF    | 400 |
| bta.TGFB2 | EASASPCCVSODLEPLTILYVIGKTPKIEQLSNMIVKSKCS                                                            | 442 |
| bbu.TGFB2 | EASASPCCVSODLEPLTILYVIGKTPKIEQLSNMIVKSKCS                                                            | 442 |

Figure S2. Comparative amino acid analysis of buffalo and cattle *TGFB2* gene

|           |                                                                                                    |     |
|-----------|----------------------------------------------------------------------------------------------------|-----|
| bta.TGFB3 | MHLIAKQSSSGREAAMFSSLLHDCRGLLPGLAALPGPRLKMHQLRALVLLALLNFATVSLSMSTCTILDNFNHIKKRVEAIRGOILSKRLTSPFD    | 100 |
| bbu.TGFB3 | MHLIAKQSSSGREAAMFSSLLHDCRGLLPGLAALPGPRLKMHQLRALVLLALLNFATVSLSMSTCTILDNFNHIKKRVEAIRGOILSKRLTSPFD    | 100 |
| bta.TGFB3 | PSGLASVPIQVLDLYNSTRELLEEVHGERGDVCTQANTESEYYAKEIYKFDMIQGLEHNDLTVCPKGITSKIFRNFVSSVEKNETNLFRAEFVFMFNP | 200 |
| bbu.TGFB3 | PSGLASVPIQVLDLYNSTRELLEEVHGERGDVCTQANTESEYYAKEIYKFDMIQGLEHNDLTVCPKGITSKIFRNFVSSVEKNETNLFRAEFVFMFNP | 200 |
| bta.TGFB3 | PASKRSEQRILFQILQPGHEIAKQRYIDGKNLPTRGTEGWLSDVTDVTRWLLRRESNLGLEISIHCPCHTFQPNGDILENIQELMEIKFKGVSDSD   | 300 |
| bbu.TGFB3 | PASKRSEQRILFQILQPGHEIAKQRYIDGKNLPTRGTEGWLSDVTDVTRWLLRRESNLGLEISIHCPCHTFQPNGDILENIQELMEIKFKGVSDSD   | 300 |
| bta.TGFB3 | PGRGDLGRLLKKKKEHPIHLIMMIFPNRLDSPGHSQRRKKRALDTNYCFRNLNCCVRLPYIDFRQDLGWKMWHEPKGYANFCSGPCPYLRSSDTHST  | 400 |
| bbu.TGFB3 | PGRGDLGRLLKKKKEHPIHLIMMIFPNRLDSPGHSQRRKKRALDTNYCFRNLNCCVRLPYIDFRQDLGWKMWHEPKGYANFCSGPCPYLRSSDTHST  | 400 |
| bta.TGFB3 | VLGLYNTLNPEASAPCCVPDLEPLTILYVIGRTPKVEQLSNMIVKSKCS                                                  | 452 |
| bbu.TGFB3 | VLGLYNTLNPEASAPCCVPDLEPLTILYVIGRTPKVEQLSNMIVKSKCS                                                  | 452 |

Figure S3. Comparative amino acid analysis of buffalo and cattle *TGFB3* gene

|           |                                                                                                      |     |
|-----------|------------------------------------------------------------------------------------------------------|-----|
| bta.INHBA | MPLLWLRGLFLLASCWIIIVRSSPTPGSEGHSAAPDCPSALATLPKDVNSQPEMVEAVKKHILNMLHLKKRPDVTQPVKAAALLNAIRKLHVGVGNGEY  | 100 |
| bbu.INHBA | MPLLWLRGLFLLASCWIIIVRSSPTPGSEGHSAAPDCPSALATLPKDVNSQPEMVEAVKKHILNMLHLKKRPDVTQPVKAAALLNAIRKLHVGVGNGEY  | 100 |
| bta.INHBA | VEIEDDIGRAEMNELMEQTSIIITFAESGTARKTLHFESKEGSDLSVVERAEIWLFLKVPKANRTSKVTIRLFQQQKHLQGSLDAGEEAEVGLKGE     | 200 |
| bbu.INHBA | VEIEDDIGRAEMNELMEQTSIIITFAESGTARKTLHFESKEGSDLSVVERAEIWLFLKVPKANRTSKVTIRLFQQQKHLQGSLDAGEEAEVGLKGE     | 200 |
| bta.INHBA | KSEMLISEKVVVDARKSTWHIFPVSSCIQRLDQGGKSSLDIRIACEQCOETGASVLVLLGKKKKKEEGEGKKRDGEGGAGGDEKEQSHRPFMLQARQSE  | 300 |
| bbu.INHBA | KSEMLISEKVVVDARKSTWHIFPVSSCIQRLDQGGKSSLDIRIACEQCOETGASVLVLLGKKKKKEEGEGKKRDGEGGAGGDEKEQSHRPFMLQARQSE  | 300 |
| bta.INHBA | DHPHRRRRRGLCEDGKVNICKCKOFFVSFKDIGWNDWIIAPSGYHANYCEGECPSHIAGTSGSSLSFHSSTVINHYMRGHSFPANLKSCCVPTKLRPMSP | 400 |
| bbu.INHBA | DHPHRRRRRGLCEDGKVNICKCKOFFVSFKDIGWNDWIIAPSGYHANYCEGECPSHIAGTSGSSLSFHSSTVINHYMRGHSFPANLKSCCVPTKLRPMSP | 400 |
| bta.INHBA | LYYDDGQNIKKDIONMIVEECGCS                                                                             | 425 |
| bbu.INHBA | LYYDDGQNIKKDIONMIVEECGCS                                                                             | 425 |

Figure S4. Comparative amino acid analysis of buffalo and cattle *INHBA* gene

|          |                                                                                                    |     |
|----------|----------------------------------------------------------------------------------------------------|-----|
| bta.BMP7 | MHMRSLRAAAPHSFVALWAPFLFLRSALADFLDNEVHSSFIHRRLSQERREMREILSILGLPHRPRPHLQGGKHNAPMFMLDLYNAMAVEEGGPDG   | 100 |
| bbu.BMP7 | MHMRSLRAAAPHSFVALWAPFLFLRSALADFLDNEVHSSFIHRRLSQERREMREILSILGLPHRPRPHLQGGKHNAPMFMLDLYNAMAVEEGGPDG   | 100 |
| bta.BMP7 | QGSFYYPYKAVSFQGPFLASLDQSHFLTDADVMVSFVNVEHDKFFHPRYHHRFRFDLSKIPEGEAVTAAEFRIYKDYIREHFHNETFRISVYQVQLE  | 200 |
| bbu.BMP7 | QGSFYYPYKAVSFQGPFLASLDQSHFLTDADVMVSFVNVEHDKFFHPRYHHRFRFDLSKIPEGEAVTAAEFRIYKDYIREHFHNETFRISVYQVQLE  | 200 |
| bta.BMP7 | HLGRESDFLLDSRTLWASEEGLVFDITATSNHVVVNPRHNLGLQLSVETLDGQSNPKLAGLIGROGPQNKQPFMVAFKKATEVHLRSTRSTGGKQRS  | 300 |
| bbu.BMP7 | HLGRESDFLLDSRTLWASEEGLVFDITATSNHVVVNPRHNLGLQLSVETLDGQSNPKLAGLIGROGPQNKQPFMVAFKKATEVHLRSTRSTGGKQRS  | 300 |
| bta.BMP7 | QNRSKTPKNQALRVANVAENSSSDQIQACKKHELIVSFRDLGWQDWIIAPEGYAAYCEGECAPFLNSYMNATNHAIVQTLVHFINPETVPKPCCAPTC | 400 |
| bbu.BMP7 | QNRSKTPKNQALRVANVAENSSSDQIQACKKHELIVSFRDLGWQDWIIAPEGYAAYCEGECAPFLNSYMNATNHAIVQTLVHFINPETVPKPCCAPTC | 400 |
| bta.BMP7 | LNATSVLYFDDSSNVILKKYRNMVVRACGCH                                                                    | 431 |
| bbu.BMP7 | LNATSVLYFDDSSNVILKKYRNMVVRACGCH                                                                    | 431 |

Figure S5. Comparative amino acid analysis of buffalo and cattle *BMP7* gene

|           |                                                                                                        |     |
|-----------|--------------------------------------------------------------------------------------------------------|-----|
| bta.INHBE | ----MG--KVOLOLVLLWALVMAQVAGSACPSCGGP--LAPOAERALVLKAKQOILEGLQTSRPLRTHPPPKAVLTRALRRLQGRVVPFANGEQVISFA    | 96  |
| bbu.INHBE | MTR--MG--KVOLOLVLLWALVMAQVAGSACPSCGGP--LAPOAERALVLKAKQOILEGLQTSRPLRTHPPPKAVLTRALRRLQGRVVPFANGEQVISFA   | 100 |
| bta.INHBE | VLTDSSSTATCSSTLTFHLSTRSHHLYHARLW--VLPPLPGPLSLRIFRMGRRRRGRGSRVFLAEHQLTTPGWHALTLPSSGLKREESGVKLRLDCSF     | 196 |
| bbu.INHBE | VLTDSSSTATCSSTLTFHLSTRSHHLYHARLW--VLPPLPGPLSLRIFRMGRRRRGRGSRVFLAEHQLTTPGWHALTLPSSGLKREESGVKLRLDCSF     | 196 |
| bta.INHBE | EGNRIV--PQLDITAGEORFFLELKT--PKLPGAGRARRRTPSCEPATPLCCRRDHYVDFQELGWADWILQPEGYRLNYCSGOCPPHLAGSPGIAASFHSAV | 296 |
| bbu.INHBE | EGNRIV--PQLDITAGEORFFLELKT--PKLPGAGRARRRTPSCEPATPLCCRRDHYVDFQELGWADWILQPEGYRLNYCSGOCPPHLAGSPGIAASFHSAV | 300 |
| bta.INHBE | FSLKANNWPPLGTSCCVPTARRPLSLLYLRDNGNVVKTQVPMVMVEACGCS                                                    | 348 |
| bbu.INHBE | FSLKANNWPPLGTSCCVPTARRPLSLLYLRDNGNVVKTQVPMVMVEACGCS                                                    | 352 |

Figure S6. Comparative amino acid analysis of buffalo and cattle *INHBE* gene

|          |                                                                                                      |     |
|----------|------------------------------------------------------------------------------------------------------|-----|
| bta.GDF6 | MDTSRVLLSAVFLISFLWDLPGFQQASISSSSSSAELGSAKGMRSRKEGRMPRAPRENATAREPLDRQEPFPPQOEPPQRRPFPQPEAREPPGRGPRVVF | 100 |
| bbu.GDF6 | MDTSRVLLSAVFLISFLWDLPGFQQASISSSSSSAELGSAKGMRSRKEGRMPRAPRENATAREPLDRQEPFPPQOEPPQRRPFPQPEAREPPGRGPRVVF | 100 |
| bta.GDF6 | HEYMLSIRYTSIAEKLGINASFFQSSKSANTITSFVDRGLDDLSHTPLARQKYLFDVSTLSDKEELVGAELRLFRQAPAAPWGPAGPLRLQLFACQSF   | 200 |
| bbu.GDF6 | HEYMLSIRYTSIAEKLGINASFFQSSKSANTITSFVDRGLDDLSHTPLARQKYLFDVSTLSDKEELVGAELRLFRQAPAAPWGPAGPLRLQLFACQSF   | 200 |
| bta.GDF6 | LLLEARSLDPOGAPRPGEVFDVWRGLRPOFWKQLCLELRAAWGGEGGAAED--ARA--GPQQPPPPDLRSLGFGRRVRTPQERALLVVFSSRQKTLFAEM | 300 |
| bbu.GDF6 | LLLEARSLDPOGAPRPGEVFDVWRGLRPOFWKQLCLELRAAWGGEGGAAED--ARA--GPQQPPPPDLRSLGFGRRVRTPQERALLVVFSSRQKTLFAEM | 300 |
| bta.GDF6 | REQLGSATEVVGPGAGAG--GGPPPP--PPSGTPDAGLWSPSPGRRRRRTAFASRHGKRHKSSRLRCSKKPLHVNFKELGWDDWIIAPLEYEAYHCEG   | 400 |
| bbu.GDF6 | REQLGSATEVVGPGAGAG--GGPPPP--PPSGTPDAGLWSPSPGRRRRRTAFASRHGKRHKSSRLRCSKKPLHVNFKELGWDDWIIAPLEYEAYHCEG   | 396 |
| bta.GDF6 | VCDFFLRSHLEPTNHAIQTLMNSMDPGSTPPSCCVPTKLTPIISILYIDAGNNVVYKQYEMMVVESCGR                                | 470 |
| bbu.GDF6 | VCDFFLRSHLEPTNHAIQTLMNSMDPGSTPPSCCVPTKLTPIISILYIDAGNNVVYKQYEMMVVESCGR                                | 466 |

Figure S7. Comparative amino acid analysis of buffalo and cattle *GDF6* gene

Figure S8. Comparative amino acid analysis of buffalo and cattle *BMP6* gene

Figure S9. Comparative amino acid analysis of buffalo and cattle *TGFB1* gene

Figure S10. Comparative amino acid analysis of buffalo and cattle *GDF11* gene

Figure S11. Comparative amino acid analysis of buffalo and cattle *BMP2* gene

Figure S12. Comparative amino acid analysis of buffalo and cattle *BMP4* gene

Figure S13. Comparative amino acid analysis of buffalo and cattle *BMP10* gene

|           |                                                                                                    |                                                                                |     |
|-----------|----------------------------------------------------------------------------------------------------|--------------------------------------------------------------------------------|-----|
| bta.INHBB | MDGLPGRALGAACLLMLAVG                                                                               | LGPGVWGSPPTPPPLPAAPQPPPPPGAGGSGDCTCTSCGGFRPEELGRVDGDFLEAVKRHILNRLQMRGRPNITHAVP | 100 |
| bbu.INHBB | MDGLPGRALGAACLLMLAVG                                                                               | LGPGVWGSPPTPPPLPAAPQPPPPPGAGGSGDCTCTSCGGFRPEELGRVDGDFLEAVKRHILNRLQMRGRPNITHAVP | 100 |
| bta.INHBB | KAAMVTALRKHLHAGKVREDGRVEIFHLDGHASPGADGQERVSEIISFAETDGLASSRVRLYFFISNEGNQNLFFVQASLWLKLLPYVLEKGGRRKRV | 200                                                                            |     |
| bbu.INHBB | KAAMVTALRKHLHAGKVREDGRVEIFHLDGHASPGADGQERVSEIISFAETDGLASSRVRLYFFISNEGNQNLFFVQASLWLKLLPYVLEKGGRRKRV | 200                                                                            |     |
| bta.INHBB | KVYFQEQGPGDRWAAVEKRVDLKRSQWHTFPLTEPIQALFSRGERRLSLDVQCD                                             | 300                                                                            |     |
| bbu.INHBB | KVYFQEQGPGDRWAAVEKRVDLKRSQWHTFPLTEPIQALFSRGERRLSLDVQCD                                             | 300                                                                            |     |
| bta.INHBB | TNLCCRQOFFIDFRLIGNWDWIIAPTGGYGNCEGSCPAYLAGVFGSASSFHTAVVNQYMRGLNPGTVNSCCIPTKLSTMSMLYFDDEYNIVKRDVPNM | 400                                                                            |     |
| bbu.INHBB | TNLCCRQOFFIDFRLIGNWDWIIAPTGGYGNCEGSCPAYLAGVFGSASSFHTAVVNQYMRGLNPGTVNSCCIPTKLSTMSMLYFDDEYNIVKRDVPNM | 400                                                                            |     |
| bta.INHBB | IVEECGCA                                                                                           |                                                                                | 408 |
| bbu.INHBB | IVEECGCA                                                                                           |                                                                                | 408 |

Figure S14. Comparative amino acid analysis of buffalo and cattle *INHBB* gene

|           |                                                                                                     |                                                                           |     |
|-----------|-----------------------------------------------------------------------------------------------------|---------------------------------------------------------------------------|-----|
| bta. BMP5 | MHLTIVFLRGIVGLWSCWVLVGS                                                                             | KGSLGDNHVNHSFIYRRLRNHERREIQREILSILGLPHRPRFSPGKQASSAPLFMLDLYNAMASEENPEELEY | 100 |
| bbu. BMP5 | MHLTIVFLRGIVGLWSCWVLVGS                                                                             | KGSLGDNHVNHSFIYRRLRNHERREIQREILSILGLPHRPRFSPGKQASSAPLFMLDLYNAMASEENPEELEY | 100 |
| bta. BMP5 | VRAPLAADSRGARKGSPASPNFYPRRIQLSRASPLTTQSPPLASLHDANFLNDADMVMSFVNIVERDKDFSQRRHYKEFRDITQIQGEAVTAAEFRI   | 200                                                                       |     |
| bbu. BMP5 | VRAPLAADSRGARKGSPASPNFYPRRIQLSRASPLTTQSPPLASLHDANFLNDADMVMSFVNIVERDKDFSQRRHYKEFRDITQIQGEAVTAAEFRI   | 200                                                                       |     |
| bta. BMP5 | YKDRSNGRFENETIKISYQIKIKEYANRDADFLDLTRKTQALDVGWLVDITVTSNHWVINPQNNLGLQLCAETGDGHSINVKASAGLVGRHGPQSKQPF | 300                                                                       |     |
| bbu. BMP5 | YKDRSNGRFENETIKISYQIKIKEYANRDADFLDLTRKTQALDVGWLVDITVTSNHWVINPQNNLGLQLCAETGDGHSINVKASAGLVGRHGPQSKQPF | 300                                                                       |     |
| bta. BMP5 | MVAFFKASEVLLRSVRAANKRNQNRKSGSHQDSSR                                                                 | SVSGVDYNTSEQKQACKKHELIVSFRDLGWQDWIIAPEGYAAFYCDGECSFPLNAHMNATNHA           | 400 |
| bbu. BMP5 | MVAFFKASEVLLRSVRAANKRNQNRKSGSHQDSSR                                                                 | SVSGVDYNTSEQKQACKKHELIVSFRDLGWQDWIIAPEGYAAFYCDGECSFPLNAHMNATNHA           | 400 |
| bta. BMP5 | IVQTLVHLMFDPHVKPKCCAPTKLNAISVLVYFDDSSNVILKKYRNMVVRSCGCH                                             |                                                                           | 454 |
| bbu. BMP5 | IVQTLVHLMFDPHVKPKCCAPTKLNAISVLVYFDDSSNVILKKYRNMVVRSCGCH                                             |                                                                           | 454 |

Figure S15. Comparative amino acid analysis of buffalo and cattle *BMP5* gene

|           |                                                                                                    |                                                                                          |     |
|-----------|----------------------------------------------------------------------------------------------------|------------------------------------------------------------------------------------------|-----|
| bta. GDF1 | MPFLCRRP                                                                                           | SRVRLLLALLLSSPPACAPAPPGPAAALLQALGLPDVPRGAPESRPVPPVMWRLFRRRDHQEARADPRMPFGATLRPCHVEELGVAGN | 100 |
| bbu. GDF1 | MPFLCRRP                                                                                           | SRVRLLLALLLSSPPACAPAPPGPAAALLQALGLPDVPRGAPESRPVPPVMWRLFRRRDHQEARADPRMPFGATLRPCHVEELGVAGN | 100 |
| bta. GDF1 | IVRHVLDRGAAARPPEPASAGQCPEWTVVFDLSAVEPAERPSQARLELRFEEAATAGTTGGWELSVAPAGAGLGPVGLRQVVPTLGGQPVRAELLSIM | 200                                                                                      |     |
| bbu. GDF1 | IVRHVLDRGAAARPPEPASAGQCPEWTVVFDLSAVEPAERPSQARLELRFEEAATAGTTGGWELSVAPAGAGLGPVGLRQVVPTLGGQPVRAELLSIM | 200                                                                                      |     |
| bta. GDF1 | ARNASAP                                                                                            | SLRLTLALRHRTPAACARLAELALLVTLDRQLCHPLARPREAE                                              | 300 |
| bbu. GDF1 | ARNASAP                                                                                            | SLRLTLALRHRTPAACARLAELALLVTLDRQLCHPLARPREAE                                              | 300 |
| bta. GDF1 | AVLSEPGGTALNHAVALRTLMHAAAPGAAGLPCCVPARLSPTISVLFFDSDNVVLRHYEDMVVDECGCR                              | 369                                                                                      |     |
| bbu. GDF1 | AVLSEPGGTALNHAVALRTLMHAAAPGAAGLPCCVPARLSPTISVLFFDSDNVVLRHYEDMVVDECGCR                              | 369                                                                                      |     |

Figure S16. Comparative amino acid analysis of buffalo and cattle *GDF1* gene

|           |                                                                                                   |     |
|-----------|---------------------------------------------------------------------------------------------------|-----|
| bta. GDF5 | MRLPKLLTLLLWHLAWLDLEFICTVLGAPDLGQRPGARPLAKAEAKERPFLAQNI                                           | 100 |
| bbu. GDF5 | MRLPKLLTLLLWHLAWLDLEFICTVLGAPDLGQRPGARPLAKAEAKERPFLAQNI                                           | 100 |
| bta. GDF5 | GPEPKGHPPTROGATRTVTPKGOLPGGKAPSKAGSVPSFLLKKAREPGSPREPKEFFRPPPTITPHEYMLSRYRTLSDADRKGNSSVKLEAGLANTI | 200 |
| bbu. GDF5 | GPEPKGHPPTROGATRTVTPKGOLPGGKAPSKAGSVPSFLLKKAREPGSPREPKEFFRPPPTITPHEYMLSRYRTLSDADRKGNSSVKLEAGLANTI | 200 |
| bta. GDF5 | TSFIDRGQDDRGF                                                                                     | 300 |
| bbu. GDF5 | TSFIDRGQDDRGF                                                                                     | 300 |
| bta. GDF5 | FKNSAQLCLELAWERGRAMDLRGDFDRAARQVHEKALFLVFGRTKKRDLFFNEIKARSGQDDKTVEYLF                             | 400 |
| bbu. GDF5 | FKNSAQLCLELAWERGRAMDLRGDFDRAARQVHEKALFLVFGRTKKRDLFFNEIKARSGQDDKTVEYLF                             | 400 |
| bta. GDF5 | KALHVNFKDMGWDDWIIAPLEYEAFHCEGLCEFLRSHLEPTNHAVIQTLMNSMDPESTPPTCCVPTLSPISILFIDSANNVVYKQYEDMVVESCGCR | 499 |
| bbu. GDF5 | KALHVNFKDMGWDDWIIAPLEYEAFHCEGLCEFLRSHLEPTNHAVIQTLMNSMDPESTPPTCCVPTLSPISILFIDSANNVVYKQYEDMVVESCGCR | 499 |

Figure S17. Comparative amino acid analysis of buffalo and cattle *GDF5* gene

|            |                                                                                                 |     |
|------------|-------------------------------------------------------------------------------------------------|-----|
| bta. GDF15 | MFGQRPAPHRSRMLLMMLFMSWLRSGGALSITOEHLQTFQGSNVHSSPDISRFRELKRKYEDLLTRLRANQIWEDSN                   | 100 |
| bbu. GDF15 | MFGQRPAPHRSRMLLMMLFMSWLRSGGALSITOEHLQTFQGSNVHSSPDISRFRELKRKYEDLLTRLRANQIWEDSN                   | 100 |
| bta. GDF15 | GHLHLRIPRVNLTGELPAASRLHRALLRLSPKAW                                                              | 200 |
| bbu. GDF15 | GHLHLRIPRVNLTGELPAASRLHRALLRLSPKAW                                                              | 200 |
| bta. GDF15 | GCPLGEGRCCHLQSLRASLEDLQWADWVLAPELDVRCIGACPSHFERSANTHAQMQRHLGLNPDAAAPCCVPASYPVVMHQDSGGRVSLTPFDDI | 300 |
| bbu. GDF15 | GCPLGEGRCCHLQSLRASLEDLQWADWVLAPELDVRCIGACPSHFERSANTHAQMQRHLGLNPDAAAPCCVPASYPVVMHQDSGGRVSLTPFDDI | 300 |
| bta. GDF15 | VAKDCHCV                                                                                        | 308 |
| bbu. GDF15 | VAKDCHCV                                                                                        | 308 |

Figure S18. Comparative amino acid analysis of buffalo and cattle *GDF15* gene

|           |                                                                                                     |     |
|-----------|-----------------------------------------------------------------------------------------------------|-----|
| bta. MSTN | MQKLQISVYIYLFMLIVAGVPDLNSENSEKENVEKEGLCNACLWRENTTSSRLAIIKIQLSKRLLETAPNISKDAIRQLLPKAPPLLELIDQFDVQRDA | 100 |
| bbu. MSTN | MQKLQISVYIYLFMLIVAGVPDLNSENSEKENVEKEGLCNACLWRENTTSSRLAIIKIQLSKRLLETAPNISKDAIRQLLPKAPPLLELIDQFDVQRDA | 100 |
| bta. MSTN | SSDGSLEDDDYHART                                                                                     | 200 |
| bbu. MSTN | SSDGSLEDDDYHART                                                                                     | 200 |
| bta. MSTN | GIWQSIDVKTVLQNLWKQEPESNLGIEIKALDENGHDLAFTFPEPGEDGLTFLEVKVTDTPKRSRDFGLDCDE                           | 300 |
| bbu. MSTN | GIWQSIDVKTVLQNLWKQEPESNLGIEIKALDENGHDLAFTFPEPGEDGLTFLEVKVTDTPKRSRDFGLDCDE                           | 300 |
| bta. MSTN | PKRYKANYSCGECEVFVLQKYPHTHLVQANPRGSAGPCCTPTKMSPINMLYFNAGEGQIIYKGI                                    | 375 |
| bbu. MSTN | PKRYKANYSCGECEVFVLQKYPHTHLVQANPRGSAGPCCTPTKMSPINMLYFNAGEGQIIYKGI                                    | 375 |

Figure S19. Comparative amino acid analysis of buffalo and cattle *MSTN* gene

|           |                                                                                        |     |
|-----------|----------------------------------------------------------------------------------------|-----|
| bta.BMP8B | MAARPGFLWLLGLALCALSGGGVFGFRPPLGCPQRRLLGPRRRDLQREILAVLGLPGRPRPRAPFAAALLPASAPLFMLDLYRAVA | 100 |
| bbu.BMP8B | MAARPGFLWLLGLALCALSGGGVFGFRPPLGCPQRRLLGPRRRDLQREILAVLGLPGRPRPRAPFAAALLPASAPLFMLDLYRAVA | 100 |
| bta.BMP8B | GRADLVMSFVNVMVER                                                                       | 200 |
| bbu.BMP8B | GRADLVMSFVNVMVER                                                                       | 200 |
| bta.BMP8B | TAASDRWLLSRNKDLGLRLYVETDDGRSVDPLAGLLGRQAPRSQKQFVVVTFRRASP                              | 300 |
| bbu.BMP8B | TAASDRWLLSRNKDLGLRLYVETDDGRSVDPLAGLLGRQAPRSQKQFVVVTFRRASP                              | 300 |
| bta.BMP8B | RQVGR                                                                                  | 400 |
| bbu.BMP8B | RQVGR                                                                                  | 400 |
| bta.BMP8B | ACGCH                                                                                  | 405 |
| bbu.BMP8B | ACGCH                                                                                  | 405 |

Figure S20. Comparative amino acid analysis of buffalo and cattle *BMP8B* gene

|          |                                                                |     |
|----------|----------------------------------------------------------------|-----|
| bta.GDF3 | MLFSLAALALCLLFTLAFGQTLQFHEHVFLRFLGLDKVPSPKKQFQVPSILKRIFQAQE    | 100 |
| bbu.GDF3 | MLFSLAALALCLLFTLAFGQTLQFHEHVFLRFLGLDKVPSPKKQFQVPSILKRIFQAQE    | 100 |
| bta.GDF3 | ASCLQKLLSFNLSAIGDEEQLTMAQLGLDLGPNITYNNGPELELSLSLVQTEPHV        | 200 |
| bbu.GDF3 | ASCLQKLLSFNLSAIGDEEQLTMAQLGLDLGPNITYNNGPELELSLSLVQTEPHV        | 200 |
| bta.GDF3 | LEIVVKGGRAS                                                    | 300 |
| bbu.GDF3 | LEIVVKGGRAS                                                    | 300 |
| bta.GDF3 | LTISLNSNYSYAFMQALMHAVDPEVFQAVCIPTKLSPISMLYQDNDNVILRHYYEDMIVDEC | 364 |
| bbu.GDF3 | LTISLNSNYSYAFMQALMHAVDPEVFQAVCIPTKLSPISMLYQDNDNVILRHYYEDMIVDEC | 364 |

Figure S21. Comparative amino acid analysis of buffalo and cattle *GDF3* gene

|          |                                                                                               |     |
|----------|-----------------------------------------------------------------------------------------------|-----|
| bta.GDF7 | MDLSAAALCLWLLSACRPDGLAEEAVLRAAGAPAESPGGGGGSGTTLAAEAGTSAALAAASPGFRGARRATGSGFRNGSVVPHQFMMSLYRSL | 100 |
| bbu.GDF7 | MDLSAAALCLWLLSACRPDGLAEEAVLRAAGAPAESPGGGGGSGTTLAAEAGTSAALAAASPGFRGARRATGSGFRNGSVVPHQFMMSLYRSL | 100 |
| bta.GDF7 | TPAGFVA                                                                                       | 200 |
| bbu.GDF7 | TPAGFVA                                                                                       | 200 |
| bta.GDF7 | EFLDAARVEFVDADALRRHRREPTSRACFLSTR                                                             | 300 |
| bbu.GDF7 | EFLDAARVEFVDADALRRHRREPTSRACFLSTR                                                             | 300 |
| bta.GDF7 | PDSR                                                                                          | 400 |
| bbu.GDF7 | PDSR                                                                                          | 400 |
| bta.GDF7 | LLNSMAPDAAPASCCVPARLSPISILYIDAANNVYKQYEDMVVEACGCR                                             | 450 |
| bbu.GDF7 | LLNSMAPDAAPASCCVPARLSPISILYIDAANNVYKQYEDMVVEACGCR                                             | 450 |

Figure S22. Comparative amino acid analysis of buffalo and cattle *GDF7* gene

|           |                                                                             |     |
|-----------|-----------------------------------------------------------------------------|-----|
| bta.INHBC | MICSLFLAFLVLAAAMVATPRADROCPACGEPALDVESHRELLLNLAKRSLDKHLRSORPTLGRFVSGVALRAAL | 100 |
| bbu.INHBC | MICSLFLAFLVLAAAMVATPRADROCPACGEPALDVESHRELLLNLAKRSLDKHLRSORPTLGRFVSGVALRAAL | 100 |
| bta.INHBC | FATGLCNTTQTRLDFHFSSSSSAGGLEVOQASLMFFVQLPNTTCPLKVRVLELSPRDTNLTSAOHLLOVDD     | 200 |
| bbu.INHBC | FATGLCNTTQTRLDFHFSSSSSAGGLEVOQASLMFFVQLPNTTCPLKVRVLELSPRDTNLTSAOHLLOVDD     | 200 |
| bta.INHBC | PEQVDNSPVVLA                                                                | 300 |
| bbu.INHBC | PEQVDNSPVVLA                                                                | 300 |
| bta.INHBC | LLKVNTAAG                                                                   | 352 |
| bbu.INHBC | LLKVNTAAG                                                                   | 352 |

Figure S23. Comparative amino acid analysis of buffalo and cattle *INHBC* gene

|           |                                                                         |     |
|-----------|-------------------------------------------------------------------------|-----|
| bta.NODAL | MHAQC                                                                   | 100 |
| bbu.NODAL | MHAQC                                                                   | 100 |
| bta.NODAL | PVALPFPNIPLSIEIFHQKRLDKNPPDCLEFRMDLFTVTLNQVTFSSGSMVLEVRPLSKWLKHPGGGLREQ | 200 |
| bbu.NODAL | PVALPFPNIPLSIEIFHQKRLDKNPPDCLEFRMDLFTVTLNQVTFSSGSMVLEVRPLSKWLKHPGGGLREQ | 200 |
| bta.NODAL | PEQRRLGGSTLLWEAESSWRAQEGQLSRERGTTRHRRYHVQDRSQLCRKVKFQVDENLIGWGSW        | 300 |
| bbu.NODAL | PEQRRLGGSTLLWEAESSWRAQEGQLSRERGTTRHRRYHVQDRSQLCRKVKFQVDENLIGWGSW        | 300 |
| bta.NODAL | RYQPHRVATCCAPVKTKRPLSMLYVDNGRVLDDHKKDMIVEECGCL                          | 346 |
| bbu.NODAL | RYQPHRVATCCAPVKTKRPLSMLYVDNGRVLDDHKKDMIVEECGCL                          | 346 |

Figure S24. Comparative amino acid analysis of buffalo and cattle *NODAL* gene

|           |                                                                               |     |
|-----------|-------------------------------------------------------------------------------|-----|
| bta.GDF10 | MARGPARTSLGPGSQQLFLLSLLLLLLLRDADGSHTAAARP                                     | 100 |
| bbu.GDF10 | MARGPARTSLGPGSQQLFLLSLLLLLLLRDADGSHTAAARP                                     | 100 |
| bta.GDF10 | SFRARLEVNVQKAVYFFNLTSMQDSEMLTATFHIFYSEPQW                                     | 200 |
| bbu.GDF10 | SFRARLEVNVQKAVYFFNLTSMQDSEMLTATFHIFYSEPQW                                     | 200 |
| bta.GDF10 | QAKDISLIVKAARRDGELL                                                           | 300 |
| bbu.GDF10 | QAKDISLIVKAARRDGELL                                                           | 300 |
| bta.GDF10 | ELPGLDERPA                                                                    | 400 |
| bbu.GDF10 | ELPGLDERPA                                                                    | 400 |
| bta.GDF10 | DAYYCSGACEFMPKMNVRPSNHATIQSIVRAVGIVPGIPEPCCVDMKSSLGVLFLDENRRNVVLKVPNMSVETCAGR | 478 |
| bbu.GDF10 | DAYYCSGACEFMPKMNVRPSNHATIQSIVRAVGIVPGIPEPCCVDMKSSLGVLFLDENRRNVVLKVPNMSVETCAGR | 478 |

Figure S25. Comparative amino acid analysis of buffalo and cattle *GDF10* gene

|          |                                                                                                   |                                                                               |          |                |     |
|----------|---------------------------------------------------------------------------------------------------|-------------------------------------------------------------------------------|----------|----------------|-----|
| bta.BMP3 | MAGARGLHLWLSCLCVSLAQQGRLRQPFPELRVAVPADRAAGGGPEPLQPLDQVSEHMLRLYDRYSGGRTEEARTPGNSLRGS               | SLRPF                                                                         | LRGENTVR | 100            |     |
| bbu.BMP3 | MAGARGLHLWLSCLCVSLAQQGRLRQPFPELRVAVPADRAAGGGPEPLQPLDQVSEHMLRLYDRYSGGRTEEARTPGNSLRGS               | SLRPF                                                                         | LRGENTVR | 100            |     |
| bta.BMP3 | SFRAGAAGMLNKLHIFNLTSLTKSENILSATLYFYIRELINISLSCPVSQECSSHAAQRKHQIDLSAWILKSSGNQSQLGHLSDVGGKPHRDFVSWI |                                                                               |          | 200            |     |
| bbu.BMP3 | SFRAGAAGMLNKLHIFNLTSLTKSENILSATLYFYIRELINISLSCPVSQECSSHAAQRKHQIDLSAWILKSSGNQSQLGHLSDVGGKPHRDFVSWI |                                                                               |          | 200            |     |
| bta.BMP3 | SKDITQLLRKAKENEEFLIGFNITTKGHQLPR                                                                  | MTSPSEPYILVYANDAAISEPESVSVSLQGHRRNFFTGAVPKLDS                                 | SRAPSI   | RRRRKRSTGVLLPL | 300 |
| bbu.BMP3 | SKDITQLLRKAKENEEFLIGFNITTKGHQLPR                                                                  | MTSPSEPYILVYANDAAISEPESVSVSLQGHRRNFFTGAVPKLDS                                 | SRAPSI   | RRRRKRSTGVLLPL | 300 |
| bta.BMP3 | QNNELPGAEEYQYKE                                                                                   | WVEERKPKYKTLQTQFPDKSNKKKQKRGKQKQSQTQLQFDEQTLKKARRKQWIEPRNCARRYLVKDFADIGWSEWII | SPKSFDAY | 400            |     |
| bbu.BMP3 | QNNELPGAEEYQYKE                                                                                   | WVEERKPKYKTLQTQFPDKSNKKKQKRGKQKQSQTQLQFDEQTLKKARRKQWIEPRNCARRYLVKDFADIGWSEWII | SPKSFDAY | 400            |     |
| bta.BMP3 | YCSGACQFPMKSLKPSNHATIQSIVRAVGVPVGIPEPCCVPEKMSLSILFFDENKNVVLKVYFNMTVESACR                          |                                                                               |          | 475            |     |
| bbu.BMP3 | YCSGACQFPMKSLKPSNHATIQSIVRAVGVPVGIPEPCCVPEKMSLSILFFDENKNVVLKVYFNMTVESACR                          |                                                                               |          | 475            |     |

Figure S26. Comparative amino acid analysis of buffalo and cattle *BMP3* gene

|          |                                                                                            |                                                                 |                                   |                                           |     |
|----------|--------------------------------------------------------------------------------------------|-----------------------------------------------------------------|-----------------------------------|-------------------------------------------|-----|
| bta.INHA | MWLQLLLLLLAFQGG                                                                            | RGCHG                                                           | LDRELVLAKVRALFDALGPPFVTGEGGDPGVRL | RRHAVGGFMRRGSEPEDQDVSQAILFPAAGASCDEPDAGEA | 100 |
| bbu.INHA | MWLQLLLLLLAFQGG                                                                            | RGCHG                                                           | LDRELVLAKVRALFDALGPPFVTGEGGDPGVRL | RRHAVGGFMRRGSEPEDQDVSQAILFPAAGASCDEPDAGEA | 100 |
| bta.INHA | EGLFTYVFQPSGHTSRQVTSQAQLWFHTGLDRQE                                                         | AAANSSEPLLGLLVLTSGGPMVPVMSLGQAPPRWAVLHLATSAPFLTHPVLAALLRCFLCSCS |                                   |                                           | 200 |
| bbu.INHA | EGLFTYVFQPSGHTSRQVTSQAQLWFHTGLDRQE                                                         | AAANSSEPLLGLLVLTSGGPMVPVMSLGQAPPRWAVLHLATSAPFLTHPVLAALLRCFLCSCS |                                   |                                           | 200 |
| bta.INHA | TRPEATPFLVAHTRAKPPSGGERARRSTPPLFWPWSAALRLQLRPPEEFAAHADCHRAALNISFQELGWDRAWVHPPSFIFYCHGGCGLS | FPQDLPLF                                                        |                                   |                                           | 300 |
| bbu.INHA | TRPEATPFLVAHTRAKPPSGGERARRSTPPLFWPWSAALRLQLRPPEEFAAHADCHRAALNISFQELGWDRAWVHPPSFIFYCHGGCGLS | FPQDLPLS                                                        |                                   |                                           | 300 |
| bta.INHA | VPGVPPTP                                                                                   | IQPLSLVPGAQPCCAALPGTMRPLHVRTTSDGGYSFKYEMVFNLLTQHCACI            |                                   |                                           | 360 |
| bbu.INHA | VPGVPPTP                                                                                   | IQPLSLVPGAQPCCAALPGTMRPLHVRTTSDGGYSFKYEMVFNLLTQHCACI            |                                   |                                           | 360 |

Figure S27. Comparative amino acid analysis of buffalo and cattle *INHA* gene

|          |                                                                                                     |                          |                                                                                |                                                               |     |
|----------|-----------------------------------------------------------------------------------------------------|--------------------------|--------------------------------------------------------------------------------|---------------------------------------------------------------|-----|
| bta.GDF2 | MGR                                                                                                 | SALWVALPVI               | CLLACSAKGKPLENRGRFSTGADAH                                                      | LLGGPGGEGEGVTFDLRMFLENMKVDFLRNILNSGVPSQDRTAEPPQYIMIDLYNRYTTDK | 100 |
| bbu.GDF2 | MGR                                                                                                 | SALWVALPVI               | CLLACSAKGKPLENRGRFSTGADAH                                                      | LLGGPGGEGEGVTFDLRMFLENMKVDFLRNILNSGVPSQDRTAEPPQYIMIDLYNRYTTDK | 100 |
| bta.GDF2 | TSTPASNIVRSFSGVEDAVSIATTEDFPFQKHILLFNISIPRHEQITRAELRLYLSCQSHMDSPHELKGNMVIYDVLDAEVDAPAGTKTFLVSQDIRDE |                          |                                                                                |                                                               | 200 |
| bbu.GDF2 | TSTPASNIVRSFSGVEDAVSIATTEDFPFQKHILLFNISIPRHEQITRAELRLYLSCQSHMDSPHELKGNMVIYDVLDAEVDAPAGTKTFLVSQDIRDE |                          |                                                                                |                                                               | 200 |
| bta.GDF2 | GWETFEVSSAVKRWIRADSTKSNKLEVTIVESHKRGCDKLDISVPPGSKNLPFFVVFSDNDRSNGTKETRELELREMI                      | GHEQESVLRKLSKNTIVVEAGENK |                                                                                |                                                               | 300 |
| bbu.GDF2 | GWETFEVSSAVKRWIRADSTKSNKLEVTIVESHKRGCDKLDISVPPGSKNLPFFVVFSDNDRSNGTKETRELELREMI                      | GHEQESVLRKLSKNTIVVEAGENK |                                                                                |                                                               | 300 |
| bta.GDF2 | EEEDVRS                                                                                             | HTPTESLVRKRKS            | GAANNHCQKTSLRVNFEDIGWDSWIIAPKEYDAFECKGGCFFPLADDVTPTKHAIVKTLVHLKPFMKVKGACCVPTKI |                                                               | 400 |
| bbu.GDF2 | EEEDVRS                                                                                             | HTPTESLVRKRKS            | GAANNHCQKTSLRVNFEDIGWDSWIIAPKEYDAFECKGGCFFPLADDVTPTKHAIVKTLVHLKPFMKVKGACCVPTKI |                                                               | 400 |
| bta.GDF2 | SPISILYKDDMGVPTLKYHYEGMSVAECGCR                                                                     |                          |                                                                                |                                                               | 431 |
| bbu.GDF2 | SPISILYKDDMGVPTLKYHYEGMSVAECGCR                                                                     |                          |                                                                                |                                                               | 431 |

Figure S28. Comparative amino acid analysis of buffalo and cattle *GDF2* gene

|          |                                                                                                      |                                            |                             |                          |     |
|----------|------------------------------------------------------------------------------------------------------|--------------------------------------------|-----------------------------|--------------------------|-----|
| bta.GDF9 | MALFN                                                                                                | FFLWFCCFAWLCPFISLDSQPSRGEAOIVARTALESEAETWS | LKHLDGRHRPGLLSPLLFVLYDGHREP | RIQPDDEKALSYMKRLYKAYATKE | 100 |
| bbu.GDF9 | MALFN                                                                                                | FFLWFCCFAWLCPFISLDSQPSRGEAOIVARTALESEAETWS | LKHLDGRHRPGLLSPLLFVLYDGHREP | RIQPDDEKALSYMKRLYKAYATKE | 100 |
| bta.GDF9 | GTPKSNRSHLYNTVRLFTPCAQHKQAPGDQAAGTLPSVDLLFNLDRTVTVVEHLKSVLLYTFNNSISFEPFVKICNLVIKEP                   | FSSKTLPRAPYSFTFN                           |                             |                          | 200 |
| bbu.GDF9 | GTPKSNRSHLYNTVRLFTPCAQHKQAPGDQAAGTLPSVDLLFNLDRTVTVVEHLKSVLLYTFNNSISFEPFVKICNLVIKEP                   | FSSKTLPRAPYSFTFN                           |                             |                          | 200 |
| bta.GDF9 | QQFEFRKKYKWIEIDVTAPLEPLVASHKRNTHMSVNETCVKDQLQHPARSDFENMTLL                                           | APSILLYLNDTSAQAQFHRWHSLSHPKRPKPSQ          | PDQKRGLSA                   |                          | 300 |
| bbu.GDF9 | QQFEFRKKYKWIEIDVTAPLEPLVASHKRNTHMSVNETCVKDQLQHPARSDFENMTLL                                           | APSILLYLNDTSAQAQFHRWHSLSHPKRPKPSQ          | PDQKRGLSA                   |                          | 300 |
| bta.GDF9 | CPMGEEAAEGVRLSRHRRDQESVSSELKKPLVPASFNLSEYFKQFLFPQNECELNDFRLSFSQLKWDNWIVAPHKYNPRYCKGDCPRAVGHRYGSPVMTM |                                            |                             |                          | 400 |
| bbu.GDF9 | CPMGEEAAEGVRLSRHRRDQESVSSELKKPLVPASFNLSEYFKQFLFPQNECELNDFRLSFSQLKWDNWIVAPHKYNPRYCKGDCPRAVGHRYGSPVMTM |                                            |                             |                          | 400 |
| bta.GDF9 | VNNITHEKLDSSVPRPSCVPKAYSPLSVLAIEPDGSIAYKEYEDMIATKCTCR                                                |                                            |                             |                          | 453 |
| bbu.GDF9 | VNNITHEKLDSSVPRPSCVPKAYSPLSVLAIEPDGSIAYKEYEDMIATKCTCR                                                |                                            |                             |                          | 453 |

Figure S29. Comparative amino acid analysis of buffalo and cattle *GDF9* gene

|           |                                                         |                                                                       |                                                        |                |     |
|-----------|---------------------------------------------------------|-----------------------------------------------------------------------|--------------------------------------------------------|----------------|-----|
| bta.BMP8A | MAARPGFLWLGLALCALSGGGV                                  | PGFRPFLGCFQRRRLGPRERRDLQREILAVLGLP                                    | RPRPRAPFAAALLPASAFPLMFLDLYRAVA                         | DDDEDGGGAPERRL | 100 |
| bbu.BMP8A | MAARPGFLWLGLALCALSGGGV                                  | PGFRPFLGCFQRRRLGPRERRDLQREILAVLGLP                                    | RPRPRAPFAAALLPASAFPLMFLDLYRAVA                         | DDDEDGGGAPERRL | 100 |
| bta.BMP8A | GRADLVMSFVNVR                                           | EPALGHQEPHWKEFHEDLTQIPAGEAVTA                                         | EFRIYKLPSTHFLNQTLLHISMFEVVPQESNRESDLFFDLQTLRSGDEGLVLDV |                | 200 |
| bbu.BMP8A | GRADLVMSFVNVR                                           | EPALGHQEPHWKEFHEDLTQIPAGEAVTA                                         | EFRIYKLPSTHFLNQTLLHISMFEVVPQESNRESDLFFDLQTLRSGDEGLVLDV |                | 200 |
| bta.BMP8A | TAASDRWLLSRNKDGLRLYVETDDGRSVDPLAGLLGRQAFRSKQPFVVTFFRASE | PGPARAPRAVRPLKRRPFKRTNEL                                              | FPNKLPGIFD                                             | VHGSHG         | 300 |
| bbu.BMP8A | TAASDRWLLSRNKDGLRLYVETDDGRSVDPLAGLLGRQAFRSKQPFVVTFFRASE | PGPARAPRAVRPLKRRPFKRTNEL                                              | FPNKLPGIFD                                             | VHGSHG         | 300 |
| bta.BMP8A | RQVGR                                                   | RRELYVSFDQLGWLWDVIAFPQGSAYYCEGECFFPLDSCNNATNHAILQSLVHLLKPHAVPKACCAPTK | SATSVLYYDSSNNVILRKRHNNVVR                              |                | 400 |
| bbu.BMP8A | RQVGR                                                   | RRELYVSFDQLGWLWDVIAFPQGSAYYCEGECFFPLDSCNNATNHAILQSLVHLLKPHAVPKACCAPTK | SATSVLYYDSSNNVILRKRHNNVVR                              |                | 400 |
| bta.BMP8A | ACGCH                                                   |                                                                       |                                                        |                | 405 |
| bbu.BMP8A | ACGCH                                                   |                                                                       |                                                        |                | 405 |

Figure S30. Comparative amino acid analysis of buffalo and cattle *BMP8A* gene

|           |                     |                                                                   |               |                        |                           |     |
|-----------|---------------------|-------------------------------------------------------------------|---------------|------------------------|---------------------------|-----|
| bta.BMP15 | MVLLSILRILLWGLVFM   | MEHRVQMTQVGQPSIAHLPEAPTLP                                         | LPIQELLEAPGKQ | QRKPRILGHPLRYMLELY     | RSADASGHPRENRTIGATMVRLVRF | 100 |
| bbu.BMP15 | MVLLSILRILLWGLVFM   | MEHRVQMTQVGQPSIAHLPEAPTLP                                         | LPIQELLEAPGKQ | QRKPRVLGHPLRYMLELY     | RSADASGHPRENRTIGATMVRLVRF | 100 |
| bta.BMP15 | LASVARPLRGSWHIOTLD  | FPRLRPNRVAYQLVRATVVYRHQLHLTHSHLSCHVEPWQKSPTNHFPSSGRGS             | SKPSL         | PKAWTEMDIMEHVQKLNHNKGR |                           | 200 |
| bbu.BMP15 | LASVARPLRGSWHIOTLD  | FPRLRPNRVAYQLVRATVVYRHQLHLTHSHLSCHVEPWQKSPTNHFPSSGRGS             | SKPSL         | PKAWTEMDIMEHVQKLNHNKGR |                           | 200 |
| bta.BMP15 | RVLRIRFVCCQPRGSEVRF | FWHGTSSLDIVFLLLYFNDTQSVQRTKPLPKGLKEFTKDP                          | SLLRRARQA     | SIASEVPGPSREHDGPESN    | CSLHPFQV                  | 300 |
| bbu.BMP15 | RVLRIRFVCCQPRGSEVRF | FWHGTSSLDIVFLLLYFNDTQSVQRTKPLPKGLKEFTKDP                          | SLLRRARQA     | SIASEVPGPSREHDGPESN    | CSLHPFQV                  | 300 |
| bta.BMP15 | SFOQLGNDHWIITAPHLYT | PNYCKGVCPRLVHYGLNSPNHAIQNLVNELVDQSVPOQSCVPYKYVPISTILLIEANGSILYKEY | GMIAQSCTCR    |                        |                           | 394 |
| bbu.BMP15 | SFOQLGNDHWIITAPHLYT | PNYCKGVCPRLVHYGLNSPNHAIQNLVNELVDQSVPOQSCVPYKYVPISTILLIEANGSILYKEY | GMIAQSCTCR    |                        |                           | 394 |

Figure S31. Comparative amino acid analysis of buffalo and cattle *BMP15* gene

|            |                       |                         |                    |                  |                        |                                |       |     |     |
|------------|-----------------------|-------------------------|--------------------|------------------|------------------------|--------------------------------|-------|-----|-----|
| bta.LEFTY2 | PLWLCWALVPL           | LAGPGAALTE              | FLDSLLQQLHISEVPIV  | KATVEGLVIPAHVR   | QYVALLQRGH             | AARSGKRFSQNFREVVGRI            | SEASS | LLV | 100 |
| bbu.LEFTY2 | PLWLCWALVPL           | LAGPGAALTE              | FLDSLLQQLHISEVPIV  | KATVEGLVIPAHVR   | QYVALLQRGH             | AARSGKRFSQNFREVVGRI            | SEASS | LLV | 100 |
| bta.LEFTY2 | FDMEQRLPPRSELVQAVLR   | LFQEPVPRALRRHERLFFPRSDR | ARVTVQWLHV         | RDDGSNR          | TALIDSRLV              | THESGWKALDVTEAVNFWQQLRSRQPLLLQ |       |     | 200 |
| bbu.LEFTY2 | FDMEQRLPPRSELVQAVLR   | LFQEPVPRALRRHERLFFPRSDR | ARVTVQWLHV         | RDDGSNR          | TALIDSRLV              | THESGWKALDVTEAVNFWQQLRSRQPLLLQ |       |     | 200 |
| bta.LEFTY2 | VLVQREHLGPLASSAHR     | LVRFAPQGPSSG            | QGEPOLELHTLDL      | RDYGAQGNCDPKAPVT | STRCCCRQEMYIDLOGMKWAEN | NWVLEPPGFLAYECVGTCCQ           |       |     | 300 |
| bbu.LEFTY2 | VLVQREHLGPLASSAHR     | LVRFAPQGPSSG            | QGEPOLELHTLDL      | RDYGAQGNCDPKAPVT | STRCCCRQEMYIDLOGMKWAEN | NWVLEPPGFLAYECVGTCCQ           |       |     | 300 |
| bta.LEFTY2 | FPESLIFKWPFLGPROCIASE | ATSLPMIVSIQEGGC         | LQPVVSLPMMRVQTCSCA | WDG              | LVPRKLEF               |                                |       |     | 367 |
| bbu.LEFTY2 | FPESLIFKWPFLGPROCIASE | ATSLPMIVSIQEGGC         | LQPVVSLPMMRVQTCSCA | SDG              | LVPRKLEF               |                                |       |     | 367 |

Figure S32. Comparative amino acid analysis of buffalo and cattle *LEFTY2* gene

|         |                       |                   |                                |                            |                           |                                  |                          |     |
|---------|-----------------------|-------------------|--------------------------------|----------------------------|---------------------------|----------------------------------|--------------------------|-----|
| bta.AMH | MPGFSLSLALVLSAMGALLR  | PGTPREEV          | STSA                           | PREQATGSGALIFQC            | NDWPL                     | SLWLPGSPLDPLCLVTLHSGSNGSRAPLRVVG | LSSYEQAFLEA              | 100 |
| bbu.AMH | MPGFSLSLALVLSAMGALLR  | PGTPREEV          | STSA                           | PREQATGSGALIFQC            | NDWPL                     | SLWLPGSPLDPLCLVTLHSGSNGSRAPLRVVG | LSSYEQAFLEA              | 100 |
| bta.AMH | VRRTHWGLSDLTITFVCPAGN | QPVIAHLQRLQAWLGE  | PGGRWLVLHLEEV                  | TWEPTLLRFQEP               | PPFGGASPP                 | ELALLVYPG                        | GLEVTGTGAGLFGTQS         | 200 |
| bbu.AMH | VRRTHWGLSDLTITFVCPAGN | QPVIAHLQRLQAWLGE  | PGGRWLVLHLEEV                  | TWEPTLLRFQEP               | PPFGGASPP                 | ELALLVYPG                        | GLEVTGTGAGLFGTQS         | 200 |
| bta.AMH | LCLTADSDFLALVVDH      | PEGAMRRPGLALT     | LRNRGNGALLSTAQLQALLFG          | ADSRCTRKT                  | PALLLLPAR                 | STAMP                            | AHGRDLVFPFPQPRASPEPEEAPF | 300 |
| bbu.AMH | LCLTADSDFLALVVDH      | PEGAMRRPGLALT     | LRNRGNGALLSTAQLQALLFG          | ADSRCTRKT                  | PALLLLPAR                 | STAMP                            | AHGRDLVFPFPQPRASPEPEEAPF | 300 |
| bta.AMH | SADFFLETLTRLVRAT      | AGPPARASPPRLALDPC | LAGFPQGVNLS                    | DPAAERLLDGE                | EPLLLLLPPTAATTG           | VVPATPGGPKSPLWAAGLARRVAAELQA     |                          | 400 |
| bbu.AMH | SADFFLETLTRLVRAT      | AGPPARASPPRLALDPC | LAGFPQGVNLS                    | DPAAERLLDGE                | EPLLLLLPPTAATTG           | VVPATPGGPKSPLWAAGLARRVAAELQA     |                          | 400 |
| bta.AMH | VAAELRALPGLPPAAPLLAR  | LLALCPGNFDPGG     | PLRALLLLKALQGLRAEWRGRERSGSARAQ | RSACAAAADG                 | PCALRELSVDLRAERSVLIPETYQA |                                  |                          | 500 |
| bbu.AMH | VAAELRALPGLPPAAPLLAR  | LLALCPGNFDPGG     | PLRALLLLKALQGLRAEWRGRERSGSARAQ | RSACAAAADG                 | PCALRELSVDLRAERSVLIPETYQA |                                  |                          | 500 |
| bta.AMH | NNCQACGWPQSDRNP       | PRYGNHVLLKMQARGA  | T                              | LARPPCCVPTAYTGKLLISLSEERIS | AHHVPMNVATECGCR           |                                  |                          | 575 |
| bbu.AMH | NNCQACGWPQSDRNP       | PRYGNHVLLKMQARGA  | T                              | LARPPCCVPTAYTGKLLISLSEERIS | AHHVPMNVATECGCR           |                                  |                          | 575 |

Figure S33. Comparative amino acid analysis of buffalo and cattle *AMH* gene
